1 **DNA segment of African Swine Fever Virus**

2 **first detected in hard ticks from sheep and bovine**

3  
4 Ze Chen<sup>1§</sup>, Xiaofeng Xu<sup>12§</sup>, Xiaojun Yang<sup>3</sup>, Weihao Dou<sup>2</sup>, Xiufeng Jin<sup>2</sup>

5 Haishuo Ji<sup>2</sup>, Guangyuan Liu<sup>1</sup>, Jianxun Luo<sup>1</sup>, Hong Yin<sup>14\*</sup>, Shan Gao<sup>2\*</sup>

6  
7 1. State Key Laboratory of Veterinary Etiological Biology and Key Laboratory of Veterinary Parasitology of  
8 Gansu Province, Lanzhou Veterinary Research Institute, Chinese Academy of Agricultural Science,  
9 Lanzhou, Gansu 730046, P.R.China.

10 2. College of Life Sciences, Nankai University, Tianjin, Tianjin 300071, P.R.China.

11 3. Faculty of Ecotourism, Southwest Forestry University, Kunming 650224, P.R.China.

12 4. Jiangsu Co-Innovation Center for the Prevention and Control of Important Animal Infectious Disease and  
13 Zoonose, Yangzhou University, Yangzhou 225009, P.R.China.

14  
15  
16  
17 § These authors contributed equally to this paper.

18 \* The corresponding authors.

19 Email: gao\_shan@mail.nankai.edu.cn (SG)

20 yinhong@caas.cn (YH)

## Abstract

In this study, we aimed to detect viruses in hard ticks using the small RNA sequencing based method. A 235-bp DNA segment was detected in *Dermacentor nuttalli* (hard ticks) and *D. silvarum* (hard ticks) from sheep and bovine, respectively. The detected 235-bp segment had an identity of 99% to a 235-bp DNA segment of African Swine Fever Virus (ASFV) and contained three single nucleotide mutations (C38T, C76T and A108C). C38T, resulting in an single amino acid mutation G66D, suggests the existence of a new ASFV strain, which is different from all reported ASFV strains in NCBI GenBank database. These results also suggest that ASFV could have a wide range of hosts or vectors, beyond the well known Suidae family and soft ticks. Our findings pave the way toward further studies of ASFV transmission and development of prevention and control measures.

**Keyword:** ASFV; hard tick; virus detection; sRNA-seq; transmission

## 51 Introduction

52 African Swine Fever Virus (ASFV) is a large (~ 190 Kbp), double-stranded DNA virus with a linear  
53 genome containing at least 150 genes. ASFV causes African Swine Fever (ASF), a highly contagious viral  
54 disease of swine. This disease results in high mortality, approaching 100% [1]. ASF first broke out in Kenya  
55 in 1921 [2] and remained restricted to Africa until 1957, when it was reported in Portugal. In the following  
56 years, ASF spread further geographically and caused economic losses on the swine industry. In 2018, ASF  
57 was reported in Liaoning province of China and then spread to more than 20 provinces. Although ASFV can  
58 be fast detected using PCR with specific primers [3], the understanding of ASFV vectors are still incomplete  
59 [4].

60 ASFV infects only members of the Suidae family including domestic pigs, warthogs and bushpigs [5].  
61 It is well accepted that only soft ticks belonging to the genus *Ornithodoros* are potential biological vectors  
62 of ASFV. To the best of our knowledge, ASFV has not been reported to be detected in *Dermacentor nuttalli*,  
63 *D. silvarum* and *Amblyomma testudinarium*, which are three species belonging to Ixodidae (hard ticks).  
64 *Dermacentor* ticks share similarities in the range of hosts as *Ornithodoros* ticks, but *Dermacentor* ticks have  
65 higher mobility and a wider range of geographic distribution. Compared to *Ornithodoros* and other *Ixodidae*  
66 ticks, *A. testudinarium* ticks have a wider range of geographic distribution in south of China, where ASF has  
67 been reported in 2018 but *Ornithodoros* occurrences have not been documented. *A. testudinarium* ticks have  
68 a wider range of hosts covering all members in the Suidae family. In addition, *Dermacentor* and  
69 *Amblyomma* ticks produce ten times eggs than *Ornithodoros* ticks. The viruses transmitted by *D. nuttalli*, *D.*  
70 *silvarum* and *A. testudinarium* are under-estimated as those transmitted by insects, based on our previous  
71 studies using high-throughput sequencing [6].

72 Small RNA sequencing (small RNA-seq or sRNA-seq) is used to obtain thousands of short RNA  
73 sequences with lengths that are usually less than 50 bp. sRNA-seq has been successful used for virus  
74 detection in plants [7], invertebrates and human [8]. In 2016, an automated bioinformatics pipeline  
75 VirusDetect has been reported to facilitate the large-scale virus detection using sRNA-seq [6]. This study  
76 aimed to detect viruses in *D. nuttalli*, *D. silvarum* and *A. testudinarium* using the sRNA-seq based method.  
77 As a unexpectedly result, VirusDetect reported the existence of ASFV in *D. nuttalli* from sheep and bovine.  
78 To confirm this result, a 235-bp DNA segment of ASFV was detected in *D. nuttalli*, *D. silvarum* and sheep,  
79 but not in *A. testudinarium* and bovine. Although we only obtained two 235-bp DNA sequences from *D.*  
80 *silvarum* and sheep, respectively, our study still proved the existence of ASFV in *D. nuttalli*, *D. silvarum*  
81 and sheep,

## 83 Results

84 After data cleaning and quality control, 13,496,191, 25,194,632, 37,888,277, 12,302,335 and

15,077,054 cleaned reads were used to detect viruses in *A. testudinarium* adults, *D. nuttalli* adults, *D. nuttalli* adults (replicate), *D. nuttalli* larvae and *D. nuttalli* nymphs (**Materials and Methods**). VirusDetect reported the existence of ASFV in all four *D. nuttalli* samples, but not in *A. testudinarium* adults. Aligning the cleaned reads to the ASFV reference genome (GenBank: AY261365.1), the mapping rates of four *D. nuttalli* samples reached 0.06% (15,585/25,194,632), 0.06% (23,330/37,888,277), 0.08% (10,241/12,302,335) and 0.08% (12,807/15,077,054), which were significantly higher than the mapping rate 0.01% (905/13,496,191) of *A. testudinarium* adults. The length distribution of virus derived small RNAs (vsRNAs) in four *D. nuttalli* samples concentrated in 15 - 19 bp rather than 21 - 24 bp. The length distribution of vsRNAs was different from those in plant [9] and other invertebrate vsRNAs [10].

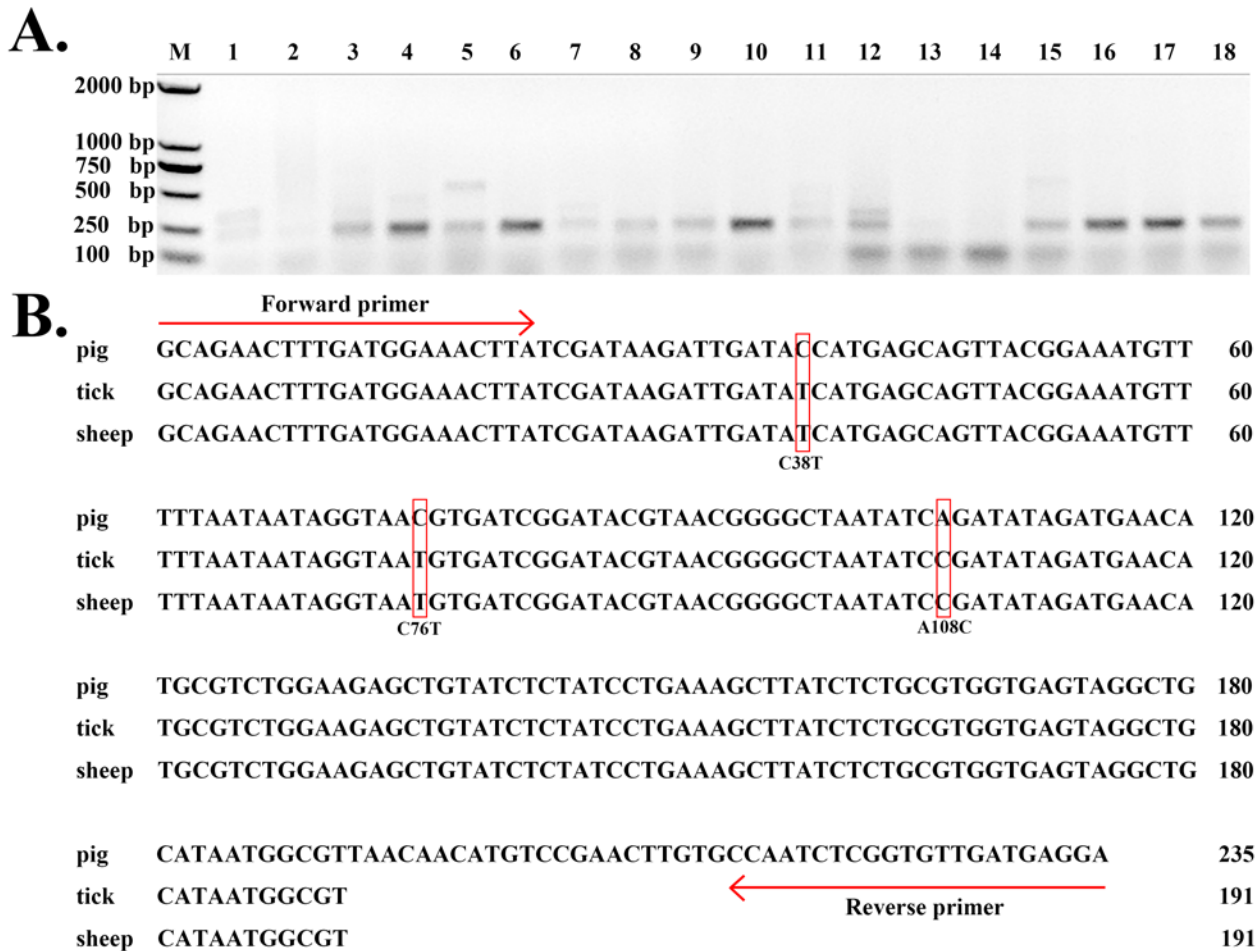

**Figure 1. 235-bp DNA segments of ASFV in hard ticks and sheep**

**A.** Lane 1-9 used DNA from *D. silvarum* and Lane 10-18 used DNA from sheep blood. **B.** Pig represents the 235-bp DNA segment from the ASFV reference genome (GenBank: AY261365.1). Tick represents the 235-bp DNA segment from *D. silvarum* amplified by PCR and sequenced by Sanger technology. Sheep represent the 235-bp DNA segment from sheep blood amplified by PCR and sequenced by Sanger technology. *D. silvarum* and sheep blood were collected from two different places in Xinjiang province of China.

To validate the existence of ASFV, we used PCR with specific primers to amplify a 235-bp ASFV segment using total RNA of the *D. nuttalli* adults (**Materials and Methods**), from which ASFV had been detected using sRNA-seq. The gel electrophoresis result showed a clear 235-bp band as we expected, but Sanger sequencing of it failed due to low DNA concentration. To confirm these results, we used PCR to

106 detect this segment in *D. silvarum* ticks, sheep and bovine collected in Xinjiang province of China. The gel  
107 electrophoresis results showed the 235-bp bands appeared in 33 and 12, out of 80 *D. silvarum* samples and  
108 100 sheep blood samples, respectively (**Figure 1A**). Two 235-bp DNA sequences were obtained using  
109 Sanger sequencing from *D. silvarum* and sheep, respectively to confirm that these 235-bp bands are the 235-  
110 bp ASFV segment (**Figure 1B**). In addition, the gel electrophoresis results showed 560-bp bands in 41 out  
111 of 100 bovine samples. Then, we obtained two 560-bp sequences using Sanger sequencing. Using blast tools,  
112 the results showed that these 560-bp bands could be segments from the bovine genome.

113 Further analysis of two 235-bp sequences from *D. silvarum* and sheep showed an identity of 100%  
114 between them (**Figure 1B**). Using the ASFV reference genome (GenBank: AY261365.1), three single  
115 nucleotide mutations were detected at the positions of 38, 76 and 108 (C38T, C76T and A108C) on these  
116 two 235-bp sequences. As the 235-bp ASFV segment encodes 78 amino acids, C38T results in a single  
117 amino acid mutation at the position 66 (G66D). C38T suggested the existence of a new ASFV strain, which  
118 was different from all reported ASFV strains in NCBI GenBank database (version 197). As the *D. silvarum*  
119 ticks and the sheep blood were collected from two different places, this new strain could infected sheep and  
120 be transmitted by *D. silvarum* ticks. Using blast tools, the results showed that the new 235-bp segment in the  
121 new ASFV strain did not contain high similar regions with sequences from other viruses, bacteria or animal  
122 genomes. As this segment was highly specific to represent ASFV, our study still proved the existence of  
123 ASFV in *D. nuttalli*, *D. silvarum* and sheep.

## 125 **Conclusion and discussion**

126 In this study, we detected a new 235-bp ASFV segment in hard ticks from sheep and bovine. Although  
127 this segment was highly specific to represent ASFV based on knowledge from the current public databases,  
128 it still can not rule out the possibilities of this segment from unknown species. The further work is to obtain  
129 the complete genome sequence of ASFV from hard ticks or sheep.

## 131 **Materials and Methods**

132 *A. testudinarium* ticks were captured from buffalo in Yunnan province of China, and *D. nuttalli* and *D.*  
133 *silvarum* ticks were captured from sheep and bovine in Xinjiang province of China. All ticks were used to  
134 pool four samples representing *A. testudinarium* adults, *D. nuttalli* adults, *D. nuttalli* larvae and *D. nuttalli*  
135 nymphs. Four samples were used to construct four sRNA-seq libraries to be sequenced using Illumina  
136 sequencing technologies with the length of 50 bp, respectively [11]. As the library of *D. nuttalli* adults was  
137 sequenced twice, five runs of sRNA-seq data were deposited at NCBI SRA database under the project  
138 accession number SRP084097.

139 The cleaning and quality control of sRNA-seq data were performed using the pipeline Fastq\_clean [12]  
140 that was optimized to clean the raw reads from Illumina platforms. The virus detection was performed using  
141 the pipeline VirusDetect [6]. Statistical computation and plotting were performed using the software R  
142 v2.15.3 with the Bioconductor packages [13]. The ASFV reference genome (GenBank: AY261365.1) was  
143 used for all the data analysis in this study.

144 The RNA extraction of *D. nuttalli* and cDNA synthesis were performed using the protocol published in  
145 our previous study [14]. The DNA extraction of *D. nuttalli*, *D. silvarum*, sheep and bovine was performed  
146 using the protocol published in our previous study [15]. PCR amplification of DNA and cDNA using ASFV  
147 specific primers GCAGAACTTTGATGGAACTTA and TCCTCATCAACACCGAGATTGGCAC to  
148 produce a 235-bp DNA segment (**Figure 1B**). PCR reaction was performed by incubation at 95 °C for 10  
149 min, followed by 40 PCR cycles (15 s at 95 °C, 30 s at 62 °C, and 30 s at 72 °C for each cycle) and a final  
150 extension at 72 °C for 7 min.

## 152 Funding

153 This study was financially supported by National Natural Science Foundation of China (31471967) to  
154 Ze Chen and National Natural Science Foundation of China (NSFC 31260106) to Xiaojun Yang.

## 156 Authors' contributions

157 ZC and SG conceived this project. SG and HY supervised this project. XY collected and identified the  
158 ticks. XX, XJ and HJ performed experiments. SG and XX analyzed the data. WD curated the sequences and  
159 prepared all the figures, tables and additional files. SG and ZC drafted the main manuscript. GL and JL  
160 revised the manuscript. **All authors have read and approved the manuscript.**

## 162 Competing interests

163 The authors declare that they have no competing interests.

## 167 REFERENCES

- 169 1. G. I and A. C, *African Swine Fever Virus: A Review*. *Viruses*, 2017. **9**(5).
- 170 2. R.E. Montgomery, *On A Form of Swine Fever Occurring in British East Africa (Kenya Colony) I*.  
171 *Journal of Comparative Pathology & Therapeutics*, 1921. **34**: p. 159-191.
- 172 3. J. Yang, G. Guan, Z. Liu, Y. Wang, Y. Li, et al., *One PCR Method Used for Detection of African*  
173 *Swine Fever Virus (in Chinese)*. *Acta Veterinaria et Zootechnica Sinica*, 2011. **42**(8): p. 1201-1206.

- 174 4. Z. Chen, J. Luo and H. Yin, *Biological Vectors of African Swine Fever (in Chinese)*. Acta  
175 Veterinaria et Zootechnica Sinica, 2011. **42**(5): p. 605-612.
- 176 5. M. Denyer and P. Wilkinson, *African Swine Fever*. Encyclopedia of Immunology (Second Edition),  
177 1998: p. 54-56.
- 178 6. Y. Zheng, S. Gao, C. Padmanabhan, R. Li, M. Galvez, et al., *VirusDetect: An automated pipeline for*  
179 *efficient virus discovery using deep sequencing of small RNAs*. Virology, 2016. **500**(2017): p. 130-  
180 138.
- 181 7. R. Li, S. Gao, A.G. Hernandez, P.W. Wechter, Z. Fei, et al., *Deep sequencing of small RNAs in*  
182 *tomato for virus and viroid identification and strain differentiation*. PLoS ONE, 2012. **7**(5): p.  
183 e37127.
- 184 8. F. Wang, Y. Sun, J. Ruan, R. Chen, X. Chen, et al., *Using small RNA deep sequencing data to detect*  
185 *human viruses*. BioMed Research International, 2016. **2016**(2016): p. 2596782.
- 186 9. X. Niu, Y. Sun, Z. Chen, R. Li, C. Padmanabhan, et al., *Using Small RNA-seq Data to Detect siRNA*  
187 *Duplexes Induced by Plant Viruses*. Genes, 2017. **8**(6): p. 163.
- 188 10. C. Liu, Z. Chen, Y. Hu, H. Ji, D. Yu, et al., *Complemented Palindromic Small RNAs First*  
189 *Discovered from SARS Coronavirus*. Genes, 2018. **9**(9): p. 442.
- 190 11. Z. Chen, Y. Sun, X. Yang, Z. Wu, K. Guo, et al., *Two featured series of rRNA-derived RNA*  
191 *fragments (rRFs) constitute a novel class of small RNAs*. Plos One, 2017. **12**(4): p. e0176458.
- 192 12. M. Zhang, F. Zhan, H. Sun, X. Gong, Z. Fei, et al. *Fastq\_clean: An optimized pipeline to clean the*  
193 *Illumina sequencing data with quality control*. in *Bioinformatics and Biomedicine (BIBM), 2014*  
194 *IEEE International Conference on*. 2014. IEEE.
- 195 13. S. Gao, J. Ou and K. Xiao, *R language and Bioconductor in bioinformatics applications(Chinese*  
196 *Edition)*. 2014, Tianjin: Tianjin Science and Technology Translation Publishing Ltd.
- 197 14. S. Gao, X. Tian, H. Chang, Y. Sun, Z. Wu, et al., *Two novel lncRNAs discovered in human*  
198 *mitochondrial DNA using PacBio full-length transcriptome data*. Mitochondrion, 2017.
- 199 15. Z. Cheng, Y. Shang, S. Gao and T. Zhang, *Overexpression of U1 snRNA induces decrease of U1*  
200 *spliceosome function associated with Alzheimer's disease*. Journal of Neurogenetics, 2017: p. 1.

201

202
